# Supplementary material for: Development of a Low-Cost Portable Electronic Nose for Cigarette Brands Identification
Source: PubMed Central journal article supplement (PMC7435456; doi:10.3390/s20154239), 2020-07-30
Supplement: sensors-20-04239-s001.pdf [file sensors-20-04239-s001.pdf]

**Table S1.** The cost of the e-nose.

| Part                   | Cost (USD) |
|------------------------|------------|
| Printed circuit board  | 14.7       |
| Sensing chamber        | 17.1       |
| Electromagnetic valves | 1.4        |
| Pump and tube          | 2.8        |
| Electronic components  | 21         |
| Sample chamber         | 18.2       |
| VOCs absorbers         | 5.6        |
| Device shell           | 17.3       |

The long-term stability of flow rate on sensor readings were also evaluated (Figure S1). The sensor resistance was continuously recorded for 5 h, which is thirty times of one single recognition for cigarette (9 minutes). Clearly, the sensor resistance slightly fluctuates with time, which could be caused by the drift of temperatures and humidity of environment.

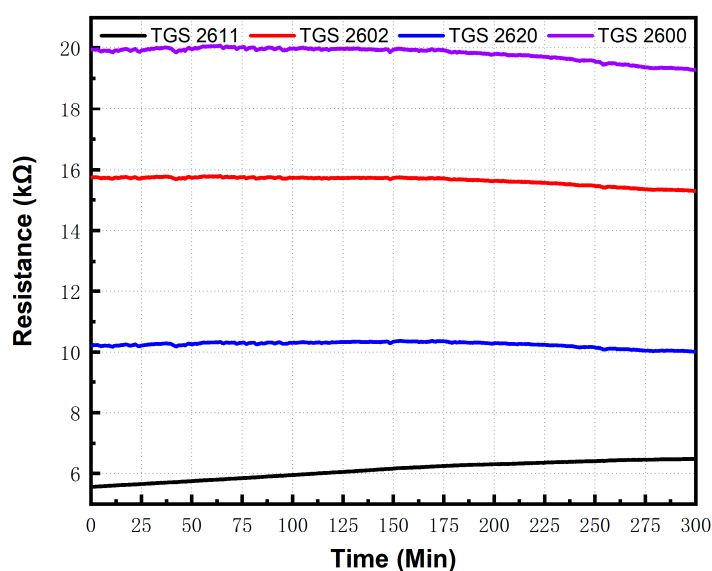

**Figure S1.** Transient response of four gas sensors in 5 hours.

In order to reduce these problems, the original data from sensors are normalized as follows:

$$D = \frac{D_0}{D_{max}}$$

$D_{max}$  indicates the maximum of sensor responses and  $D_0$  represents the sensor data before normalize. A typical figure of data after normalization is shown in Supporting Information Figure S2.

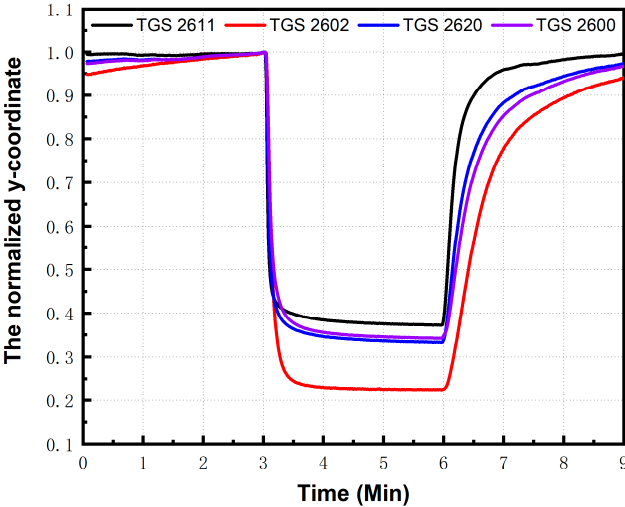

Figure S2. Data after normalization.
